# Supplementary material for: Design and synthesis of a terrylene diimide-based stable cyan dye for printable electrofluidic display
Source: Royal Society of Chemistry journal article supplement (doi:10.1039/d3ma00177f), 2023-01-01
Supplement: d3ma00177f1.pdf [file d3ma00177f1.pdf]

# Design and Synthesis of a Terrylene Diimide-Based Stable Cyan Dye for Printable Electro-Fluidic Display

Yong Deng,<sup>†a,c</sup> Yuanyuan Guo,<sup>†b</sup> Dechao Ye,<sup>a,c</sup> Wangqiao Chen,<sup>\*b</sup> and Guofu Zhou<sup>\*b</sup>

<sup>a</sup>Academy of Shenzhen Guohua Optoelectronics, Shenzhen 518110, P. R. China

<sup>b</sup>Guangdong Provincial Key Laboratory of Optical Information Materials and Technology & Institute of Electronic Paper Displays, South China Academy of Advanced Optoelectronics, South China Normal University, Guangzhou 510006, P. R. China.

<sup>c</sup>Shenzhen Guohua Optoelectronics Tech. Co. Ltd., Shenzhen 518110, P.R. China

## Content:

|                                                            |   |
|------------------------------------------------------------|---|
| 1. <sup>1</sup> H NMR and <sup>13</sup> C NMR spectra..... | 2 |
| 2. MS spectra.....                                         | 5 |
| 3. CV of Ferrocene.....                                    | 6 |
| 4. TGA curve of compound TDIC.....                         | 6 |
| 5. Viscosity of compound TDIC.....                         | 7 |

# 1. $^1\text{H}$ NMR and $^{13}\text{C}$ NMR spectra

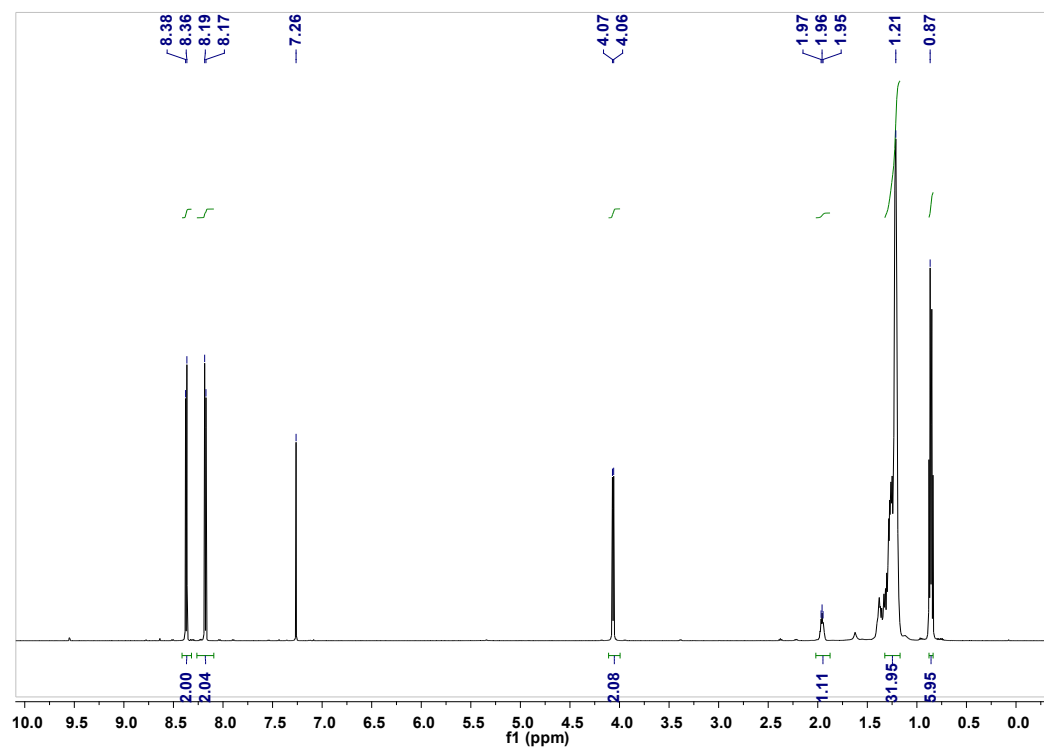

Fig. S1:  $^1\text{H}$  NMR of compound 2

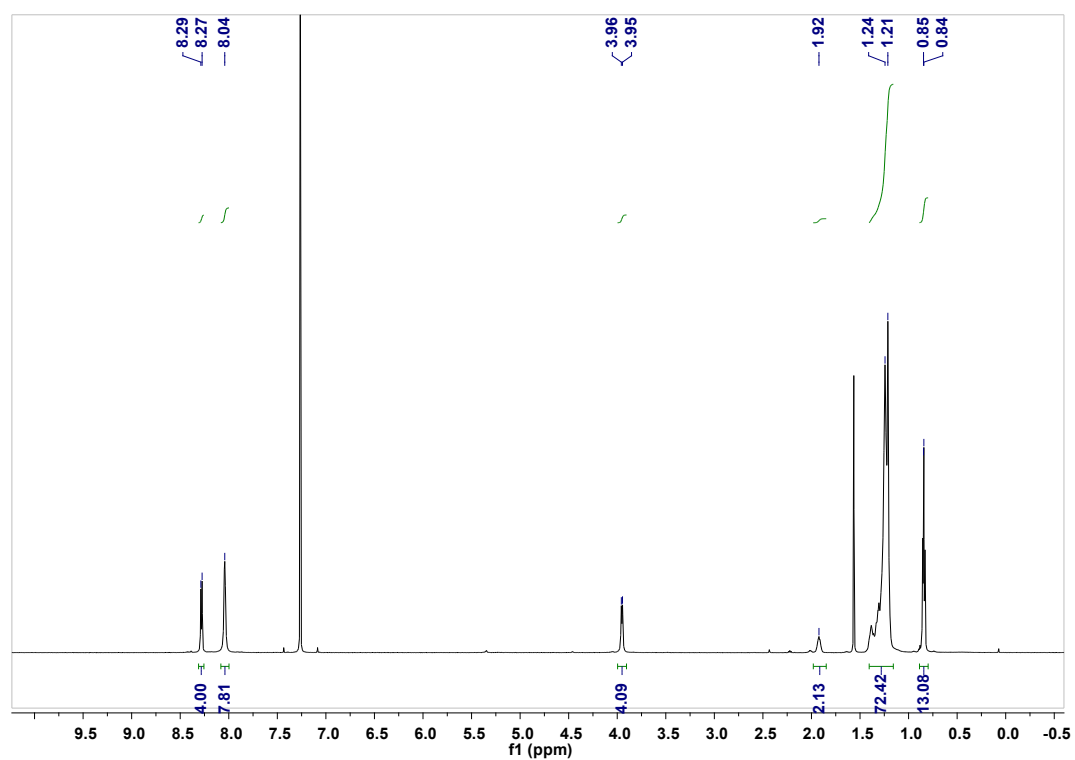

Fig. S2:  $^1\text{H}$  NMR of compound TDI-C8C12

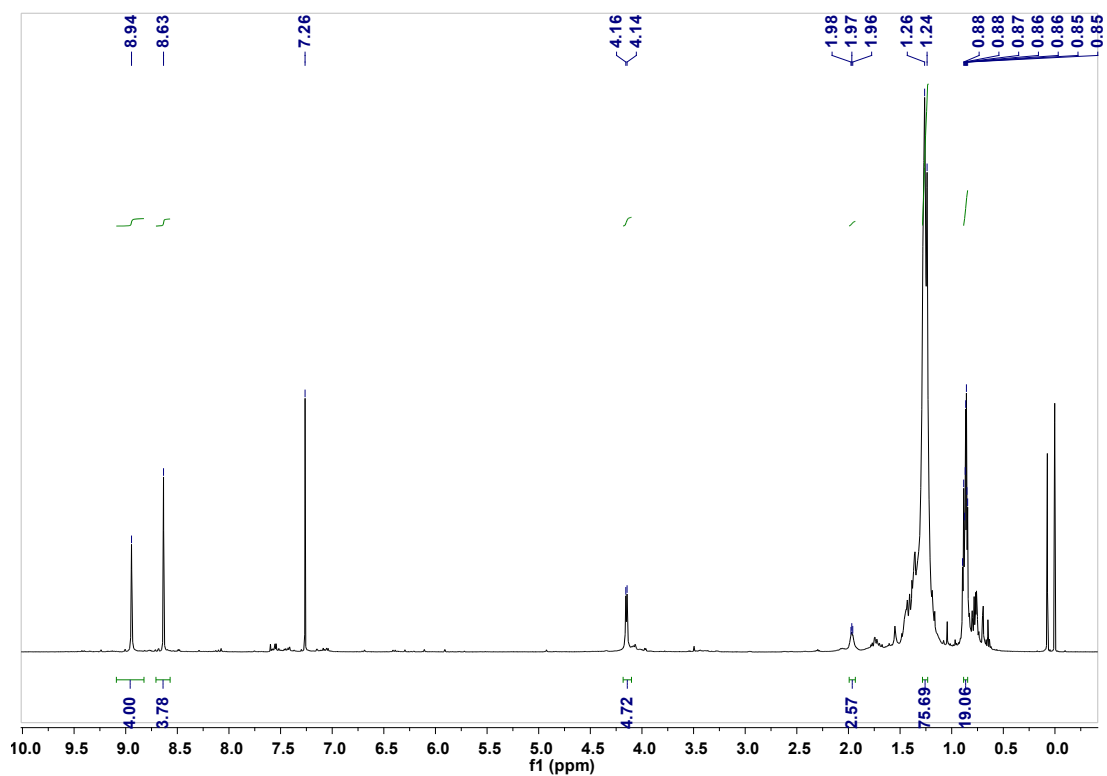

Fig. S3: <sup>1</sup>H NMR of compound 4-Br-TDI-C8C12

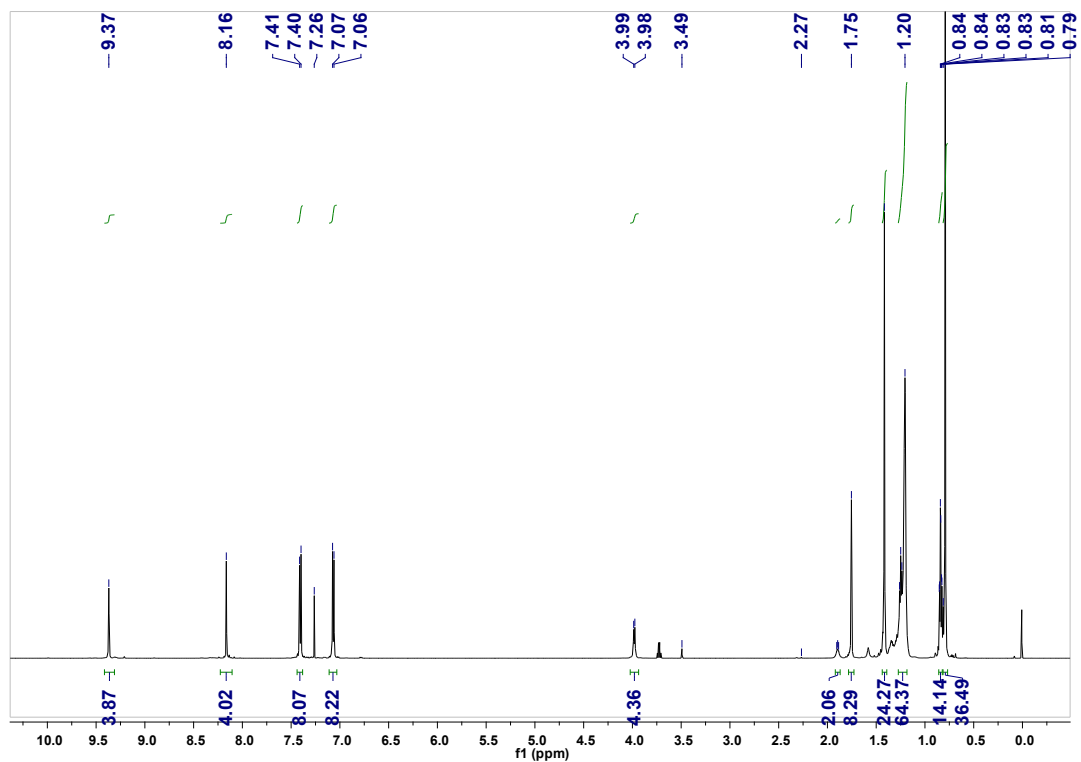

Fig. S4: <sup>1</sup>H NMR of compound TDIC

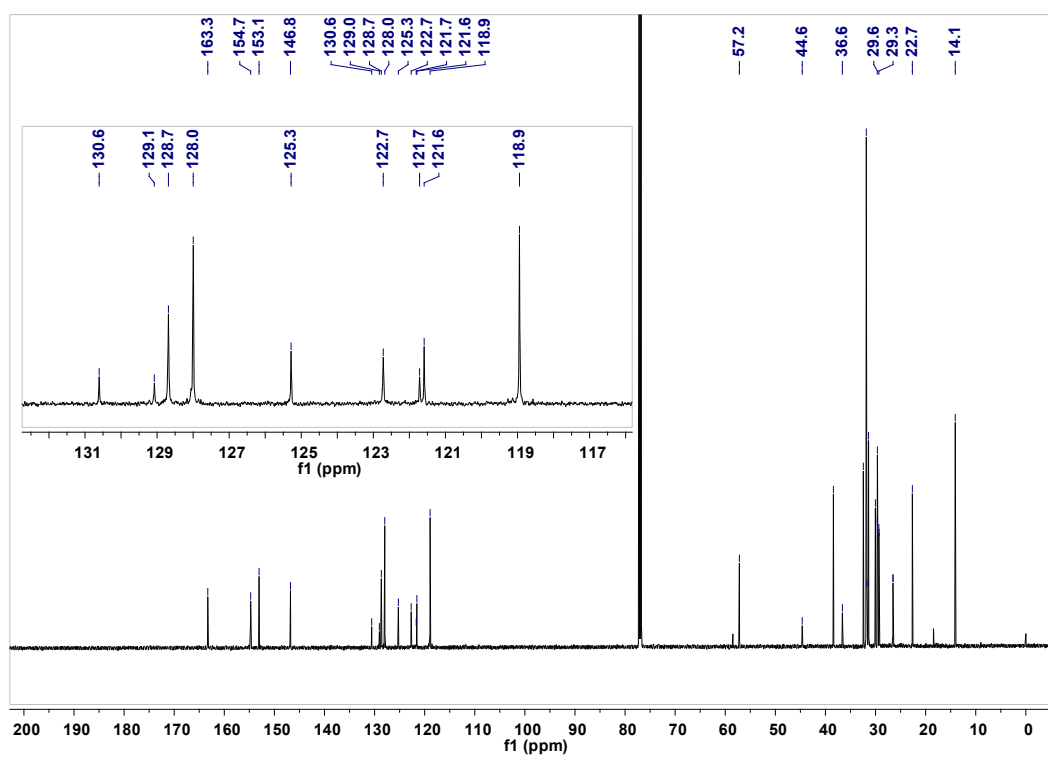

Fig. S5:  $^{13}\text{C}$  NMR of compound TDIC

## 2. MS spectra

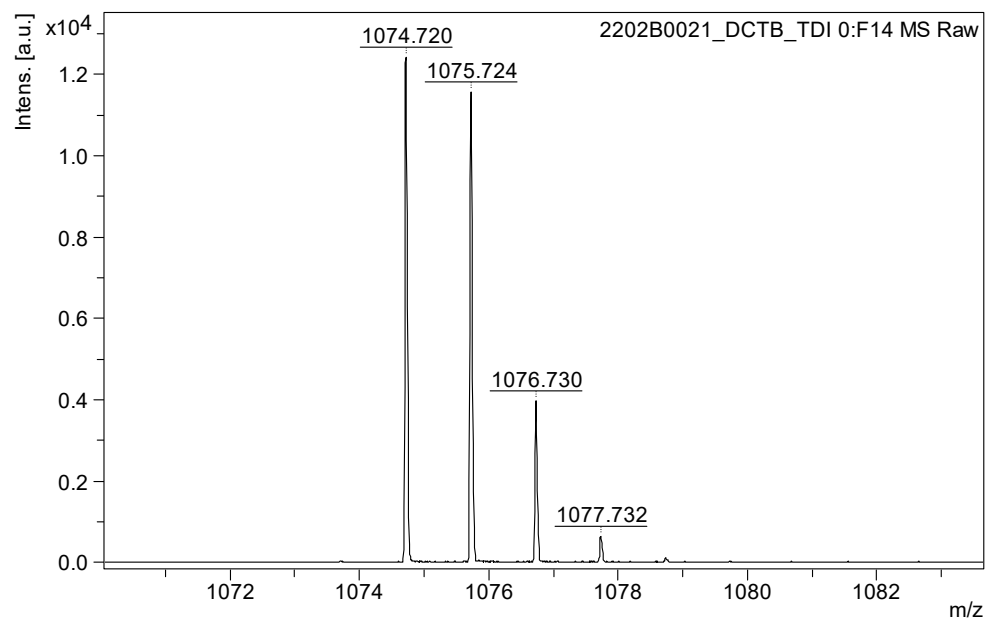

Fig. S6: HRMS of compound TDI-C8C12

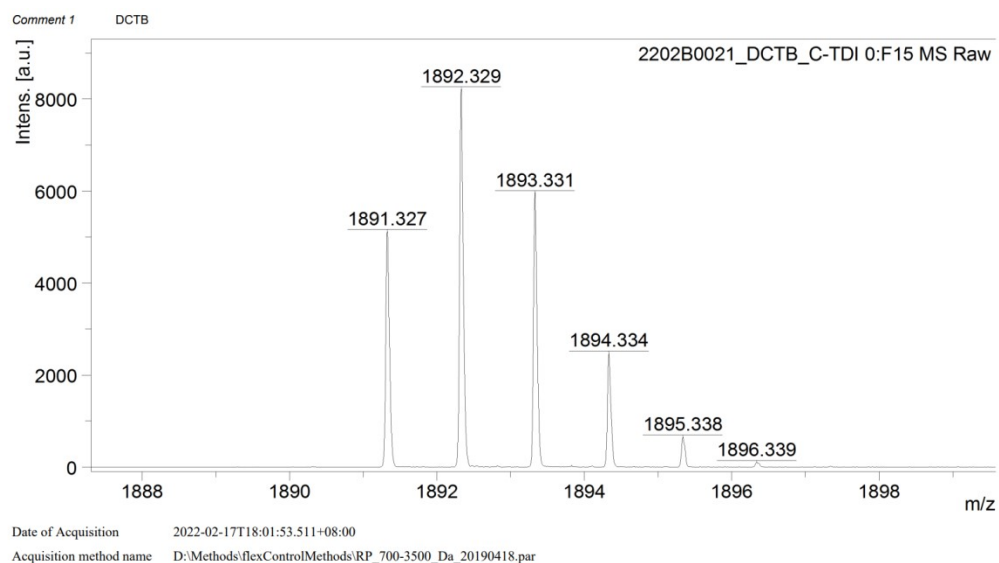

Fig. S7: HRMS of compound TDIC

### 3. CV of Ferrocene

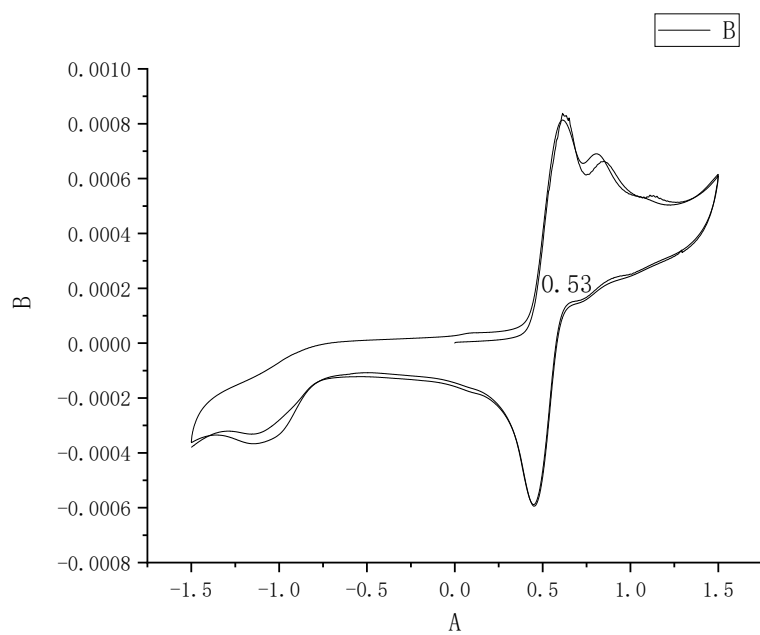

Fig. S8: CV of compound Ferrocene

### 4. TGA curve of compound TDIC

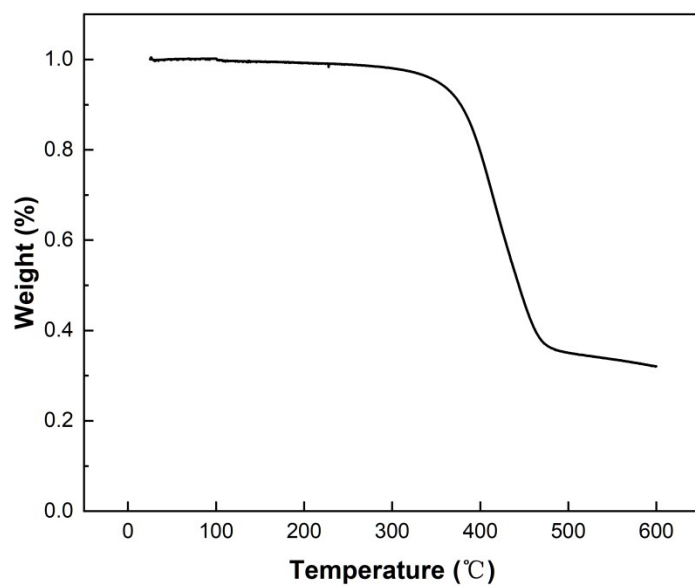

Fig. S9: TGA of compound TDIC

## 5. Viscosity of compound TDIC

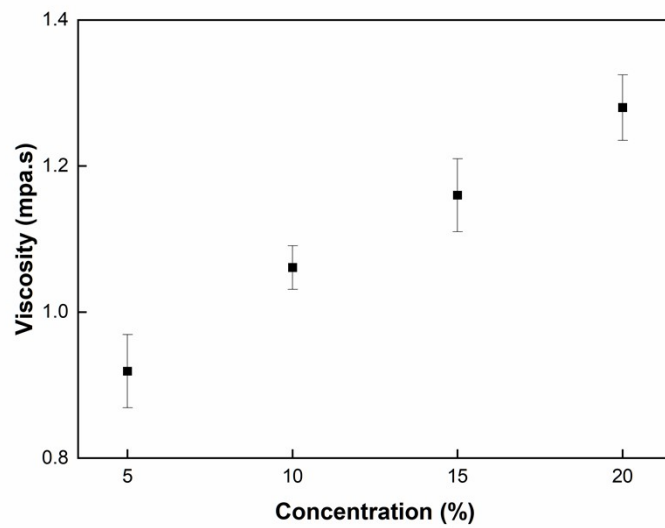

Fig. S10: The viscosity of 5%, 10%, 15%, 20% concentration for TDIC cyan oil.
